# Supplementary material for: Academ Virus, a Novel Hantavirus in the Siberian Mole (Talpa altaica) from Russia
Source: MDPI journal article supplement (doi:10.3390/v14020309), 2022-02-02
Supplement: s1 [file s1]

**Table S1.** Oligonucleotide primers used to amplify the S and M segments of mole-borne hantaviruses.

| Segment | Primer  | Sequence (5'-3') (Polarity)               |
|---------|---------|-------------------------------------------|
| SML     | OSM55   | TAG TAG TAG ACT CC (+/-)                  |
| S       | S2FR    | TAG TAG TAK RCT CCC TAA ARA G (+/-)       |
|         | S437F   | SWG GTC ARA CTG CHR AYT GG (+)            |
|         | S593R   | GAC TGG GCA TTN GGC ATN GA (-)            |
|         | S2      | AGC TCA GGA TCC ATG TCA TC (-)            |
|         | S952F   | TGG GTN TTT GCW GGN GCA CC (+)            |
| M       | M-AC    | CTG CAG TAG TAG TAK RCT CCG CAG (+/-)     |
|         | MC600R  | TCA GGT TGR AAG CAT CTW CCY TC (-)        |
|         | M1200R  | CCW CCC TCT GAR TAT GCC TCA CAT (-)       |
|         | MC790F  | TGT RTW GCA GGW GGA AAT TCA GA (+)        |
|         | MC1020F | GTA TGT WTT YTC GAA RGA TGA AGA (+)       |
|         | MC1010R | TCT TCA TCY TTY GAR AAW ACA TAC AA (-)    |
|         | MA1490F | TGT GTN CCW GGN TTY CAT GG (+)            |
|         | M1685F  | ACN AAG GGY TCW ATG GTN TGT GA (+)        |
|         | MC1710R | CAC TCT AAT TTG CAR AYA TCA CAW ACC (-)   |
|         | M2560F  | GGW ACT GTT TCW AAA TTT CAR CCW GGA G (+) |
|         | M2631R  | CAT GAT RTC NCC AGG RTC NCC (-)           |
|         | MC3100F | ATT CAG RGG AAA TTG GAT GG (+)            |

Abbreviations: A, Adenine; C, Cytosine; G, Guanine; H, A or C or T; K, G or T; N, any nucleotide; R, A or G; S, G or C; T, Thymine; W, A or T; Y, C or T.
